# Supplementary material for: Shielding of Photosynthetic Apparatus by Consortia of Bacterial Endophytes in Tomato Plants Suffering From Fusarium Wilt
Source: Frontiers journal article supplement (doi:10.3389/fagro.2022.831731), 2022-05-18
Supplement: Data_Sheet_3.DOCX [file Data_Sheet_3.DOCX]

Antagonistic activity of *Pseudomonas fluorescens* BUMD5 and *Bacillus velez*e*nsis* BUMD9 against *Fusarium oxysporum* in dual culture method


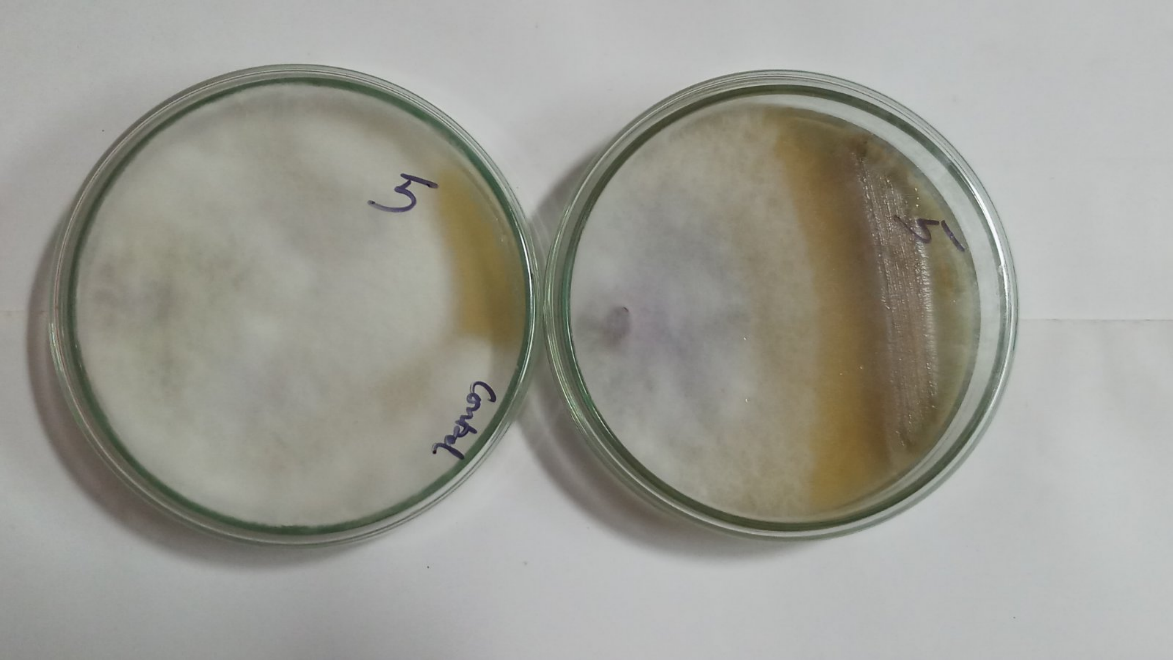


Fig 1: The growth of *Fusarium oxysporum* inhibited by *Pseudomonas fluorescens* BUMD5 as compared to control


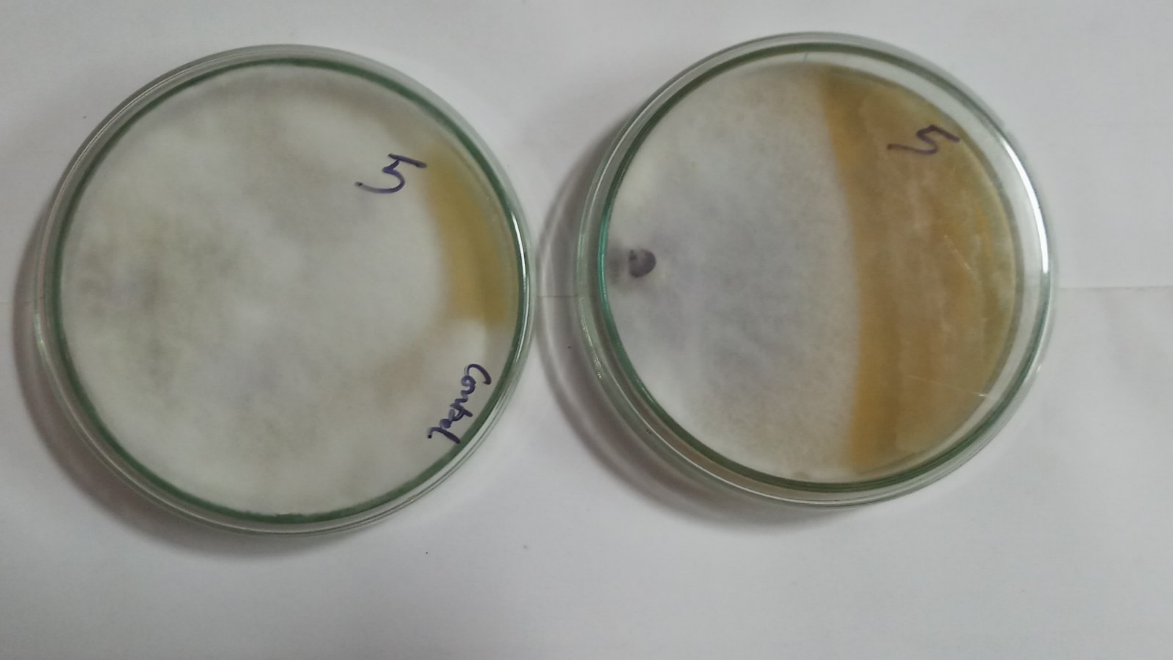


Fig 2: The growth of *Fusarium oxysporum* inhibited by *Bacillus velezensis* BUMD9 as compared to control
